# Supplementary material
Source: publisher figshare collection journal article supplement (https://tandf.figshare.com/articles/dataset/_/5612881)

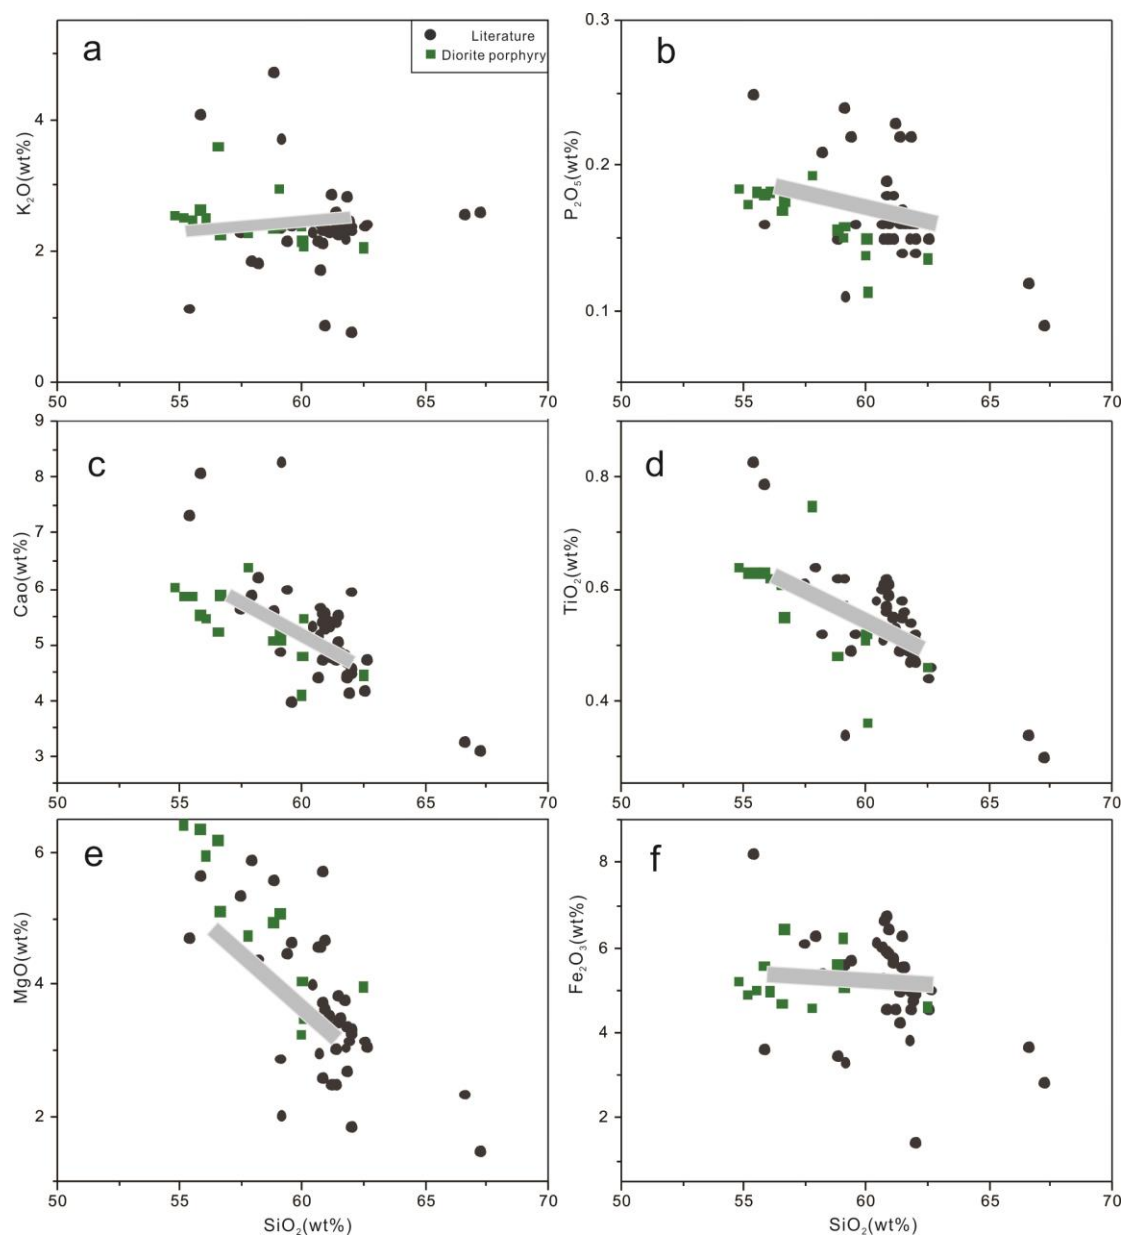

S-FIG.1

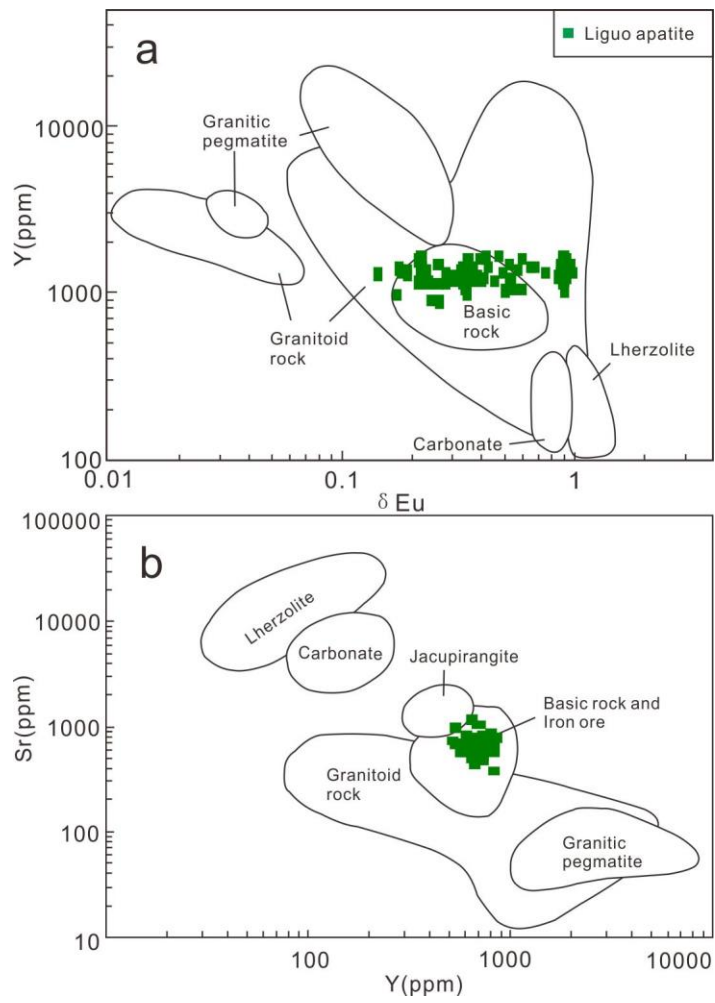

S-FIG.2

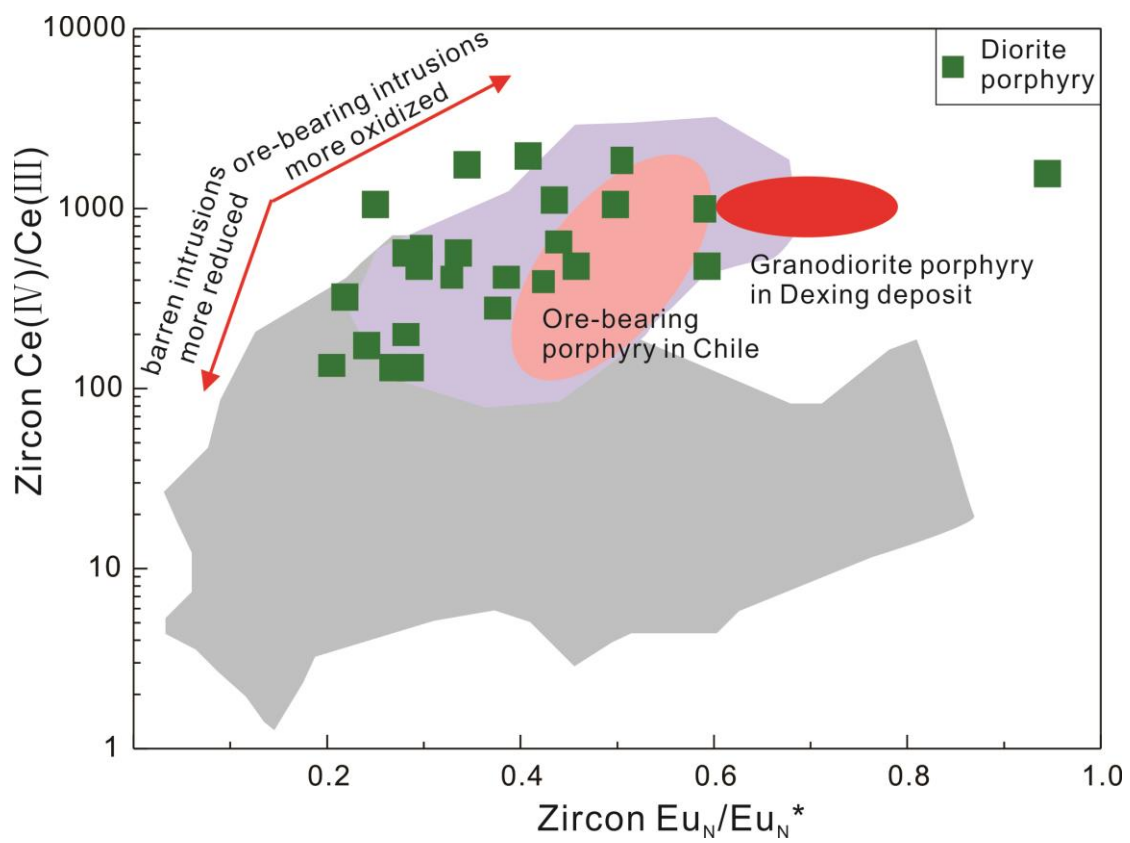

S-FIG.3

Supplement: Supplementary file 1 [file 1]
